# Supplementary material
Source: PubMed Central journal article supplement (PMC4447886)
Supplement: supp_dev052_dev052supp_fig1.pdf [file supp_dev052_dev052supp_fig1.pdf]

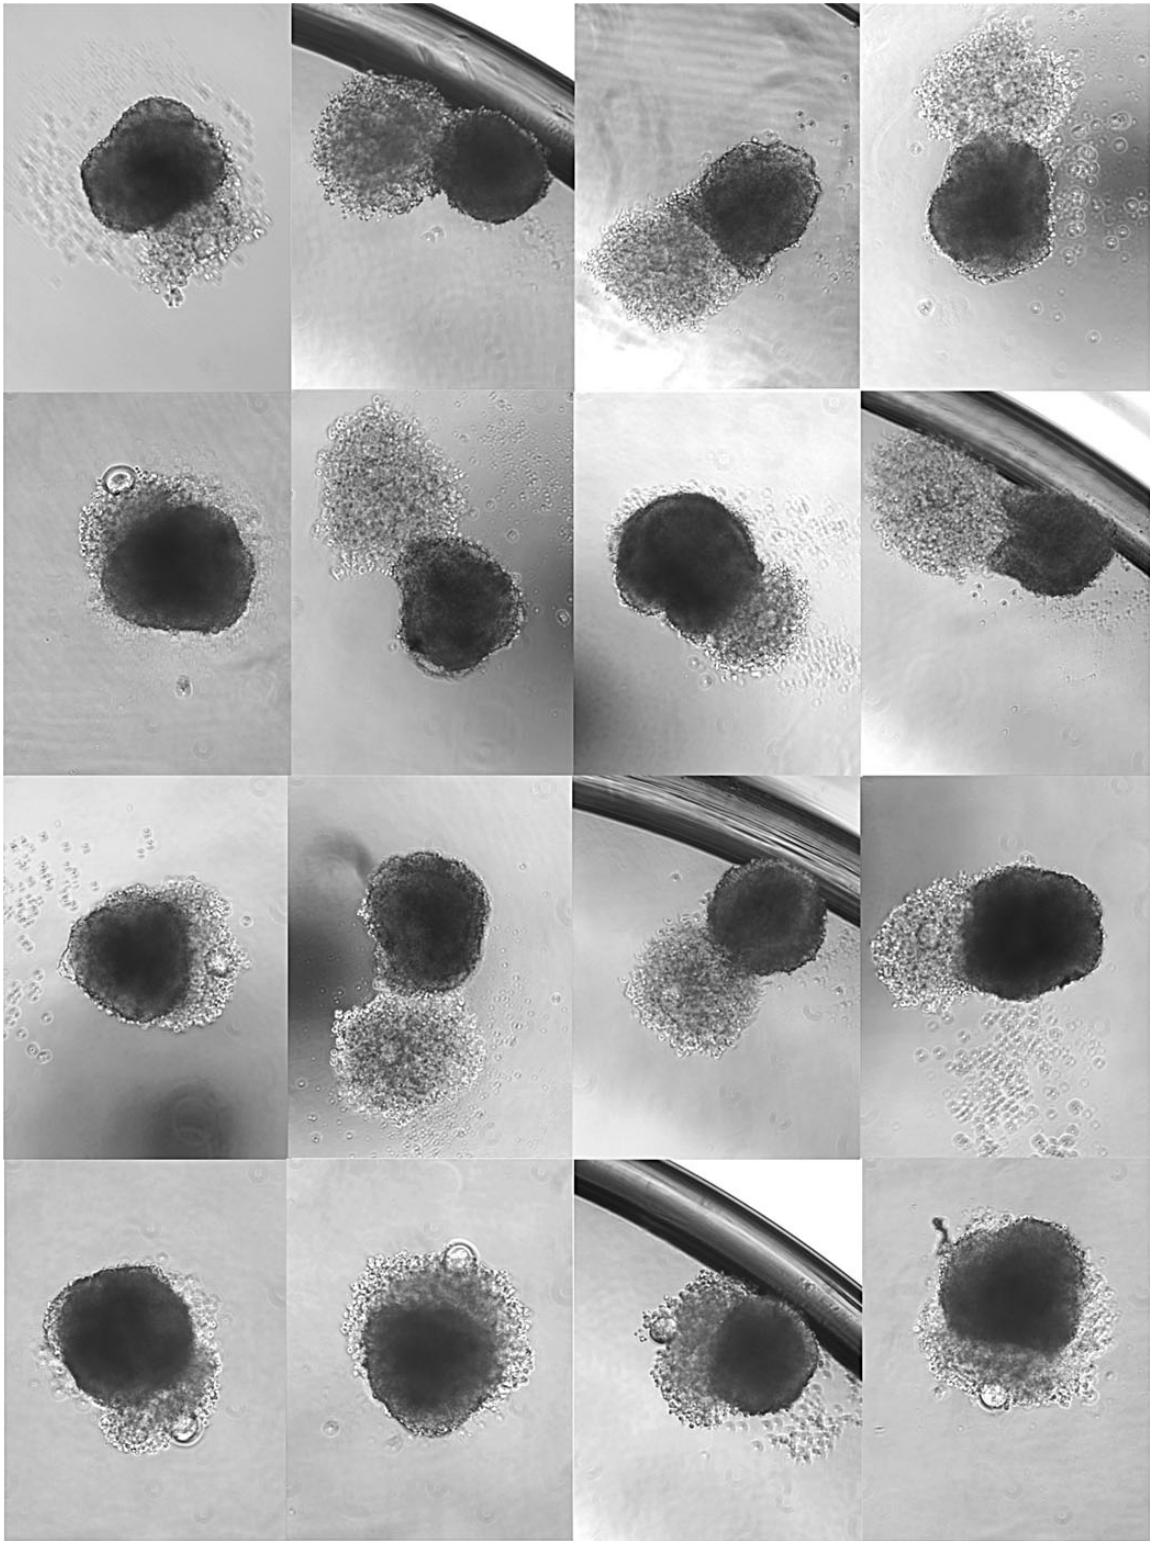

**Supplementary Figure S1** Images of *in vitro* ovulation. Shown are representative images of mouse follicles post-ovulatory stimulus *in vitro*.
