# Supplementary material
Source: PubMed Central journal article supplement (PMC4447886)
Supplement: supp_dev052_dev052supp_fig2.pdf [file supp_dev052_dev052supp_fig2.pdf]

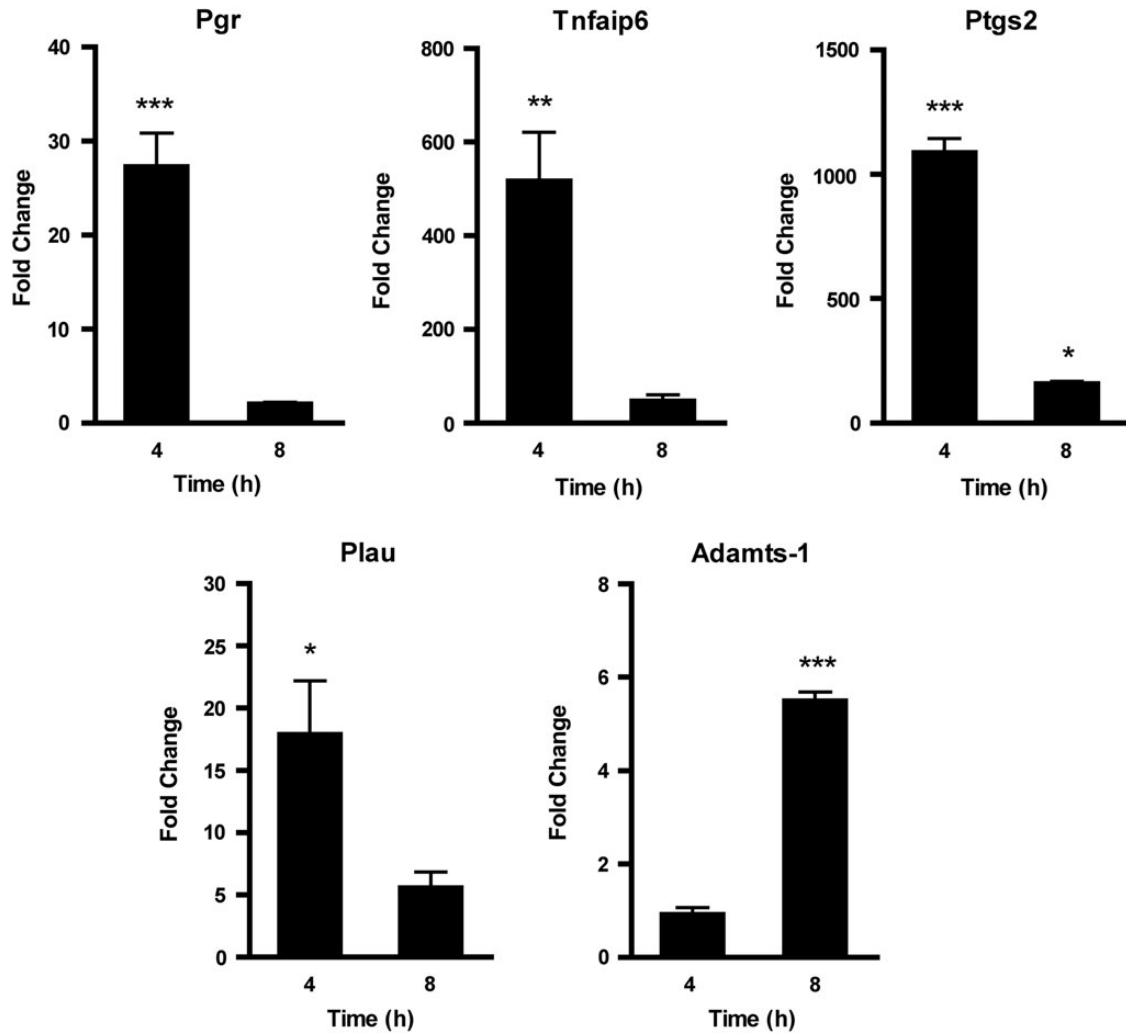

**Supplementary Figure S2** Transcriptional changes associated with *in vitro* ovulation. Analysis of follicles before and after hCG treatment showing qRT-PCR results of transcripts associated with *in vitro* ovulation: progesterone receptor (*Pgr*), tumor necrosis factor, alpha-induced protein 6 (*Tnfaip6*), prostaglandin-endoperoxidase protein synthase 2 (*Ptgs2*), plasminogen activator, urokinase (*Plau*) and a disintegrin and metalloproteinase with thrombospondin type 1 motif 1 (*Adamts-1*). Transcript abundance is expressed as fold change relative to pre-hCG follicles (FC = 1). Data are expressed as mean  $\pm$  SEM,  $n = 3$  cultures; \* $P < 0.05$ , \*\* $P < 0.01$ , \*\*\* $P < 0.001$  according to one-way ANOVA followed by the Bonferroni's Multiple Comparison Test.
