# Supplementary material
Source: PubMed Central journal article supplement (PMC4447886)
Supplement: supp_dev052_dev052supp_fig4.pdf [file supp_dev052_dev052supp_fig4.pdf]

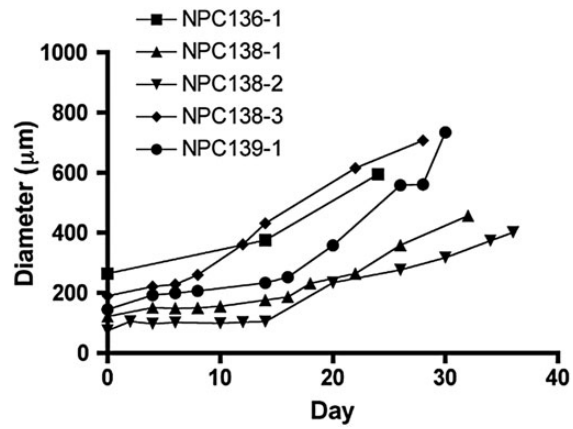

**Supplementary Figure S4** Human follicle diameters throughout eIVFG. Primary to secondary stage (74–260  $\mu\text{m}$ ) human follicles were isolated and encapsulated in alginate. Shown are diameters of each individual follicle corresponding to the hormone quantification shown in Fig. 4.
