# Supplementary material
Source: PubMed Central journal article supplement (PMC4447886)
Supplement: supp_dev052_dev052supp_table1.pdf [file supp_dev052_dev052supp_table1.pdf]

---

**Supplementary Table S1 Human ovarian tissue characteristics.**

| <b>ID</b>    | <b>Diagnosis</b>                        | <b>Year of birth</b> | <b>Number of follicles</b> |
|--------------|-----------------------------------------|----------------------|----------------------------|
| NPC-2013-136 | Pre-B Cell acute lymphoblastic leukemia | 2007                 | 1                          |
| NPC-2013-138 | ALL                                     | 1979                 | 2                          |
| NPC-2013-139 | ALL                                     | 1998                 | 2                          |

ALL, acute lymphoblastic leukemia.
